# Supplementary material for: Anti-Inflammatory, Anti-Diabetic, and Anti-Alzheimer’s Effects of Prenylated Flavonoids from Okinawa Propolis: An Investigation by Experimental and Computational Studies
Source: PubMed Central journal article supplement (PMC6222853; doi:10.3390/molecules23102479), 2018-09-27
Supplement: molecules-23-02479-s001.pdf [file molecules-23-02479-s001.pdf]

## Supporting information

# Anti-Inflammatory, Anti-Diabetic, and Anti-Alzheimer's Effects of Prenylated Flavonoids from Okinawa Propolis: An Investigation by Experimental and Computational Studies

**Md Shahinozzaman**<sup>1,2</sup>, **Nozomi Taira**<sup>3</sup>, **Takahiro Ishii**<sup>1,3</sup>, **Mohammad A. Halim**<sup>4</sup>, **Md Amzad Hossain**<sup>1,5</sup> and **Shinkichi Tawata**<sup>2,3,\*</sup>

<sup>1</sup> The United Graduate School of Agricultural Sciences, Kagoshima University, Korimoto 1-21-24, Kagoshima 890-0065, Japan; mshahin81@gmail.com (M.S.); ishiit@agr.u-ryukyu.ac.jp (T.I.); amzad@agr.u-ryukyu.ac.jp (M.A.H.)

<sup>2</sup> PAK Research Center, University of the Ryukyus, Okinawa 903-0213, Japan

<sup>3</sup> Department of Bioscience and Biotechnology, Faculty of Agriculture, University of the Ryukyus, Senbaru 1, Nishihara-cho, Okinawa 903-0213, Japan; taira5935@gmail.com

<sup>4</sup> Division of Computer Aided Drug Design, The Red-Green Research Centre, 218 Elephant Road, Dhaka-1205, Bangladesh; mahalim@grc-bd.org

<sup>5</sup> Subtropical Field Science Center, University of the Ryukyus, Senbaru 1, Nishihara-cho, Okinawa 903-0213, Japan

\* Correspondence: b986097@agr.u-ryukyu.ac.jp; Tel.: +81-090-5472-6883

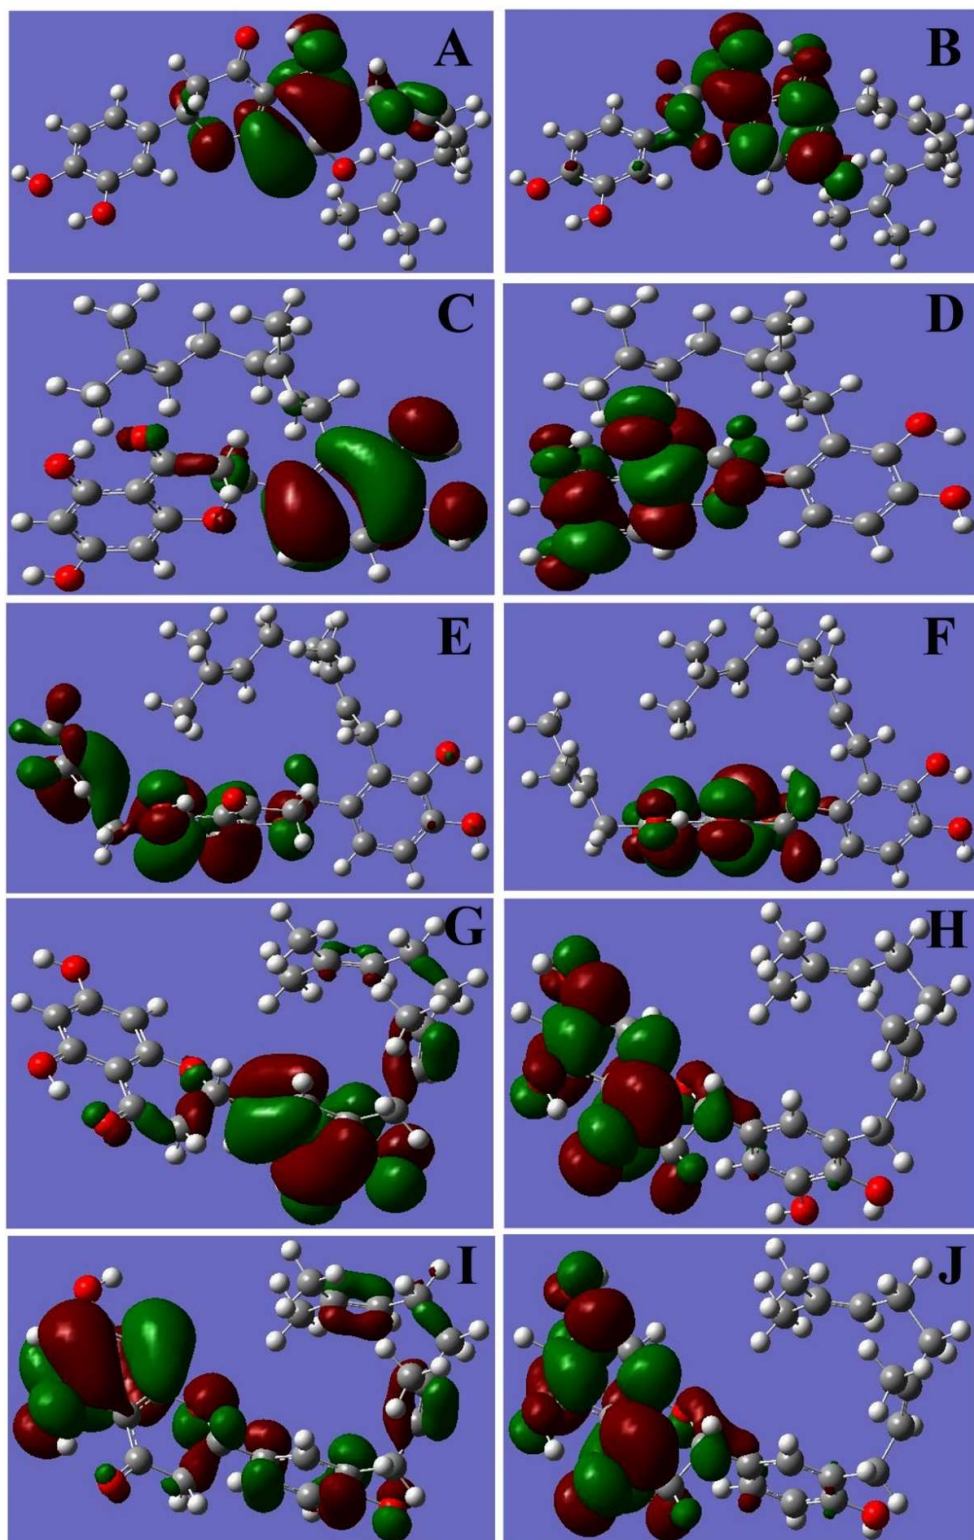

**Figure S1.** Visualization of frontier molecular orbitals of Okinawa propolis (OP) compounds. A, B – HOMO and LUMO of nymphaeol A (NA); C, D – HOMO and LUMO of nymphaeol B (NB); E, F – HOMO and LUMO of nymphaeol C (NC); G, H – HOMO and LUMO of isonymphaeol B (INB); I, J – HOMO and LUMO of 3'-geranyl-naringenin (GN). HOMO = highest occupied molecular orbital; LUMO = lowest unoccupied molecular orbital

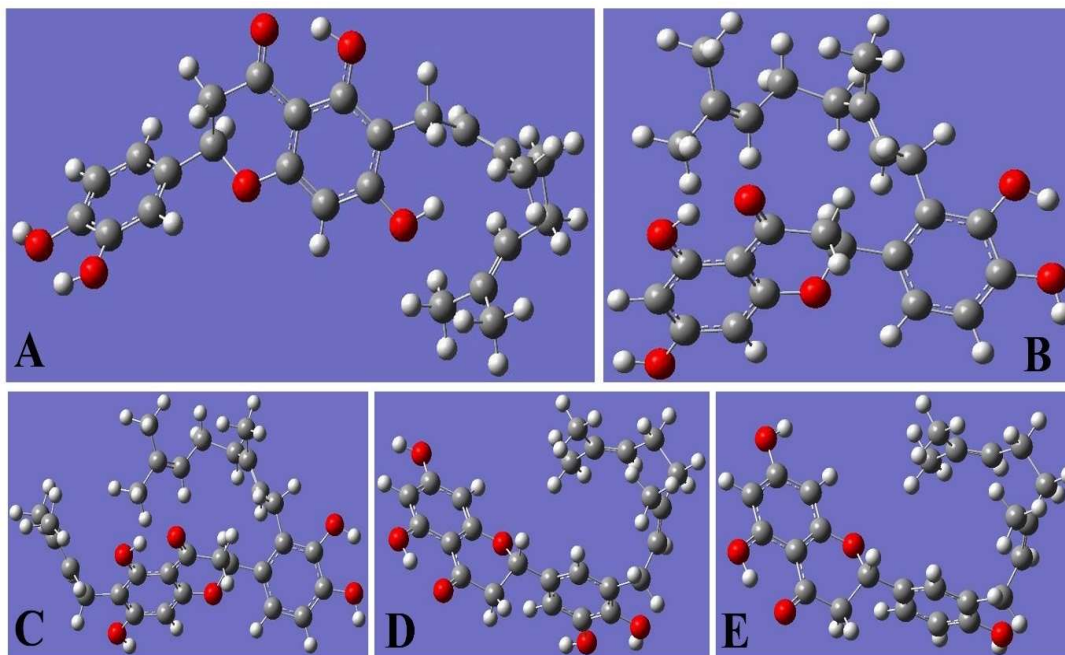

**Figure S2.** Optimized structures of OP compounds. A – NA, B – NB, C – NC, D – INB, F – GN.
